# Supplementary material for: SARS-CoV-2 infection produces chronic pulmonary epithelial and immune cell dysfunction with fibrosis in mice
Source: PubMed Central journal article supplement (PMC9273046; doi:10.1126/scitranslmed.abo5070), 2022-07-07
Supplement: scitranslmed.abo5070_sm.pdf [file scitranslmed.abo5070_sm.pdf]

Supplementary Materials for  
**SARS-CoV-2 infection produces chronic pulmonary epithelial and immune cell  
dysfunction with fibrosis in mice**

Kenneth H. Dinnon III *et al.*

Corresponding authors: Wanda K. O'Neal, wanda\_o'neal@med.unc.edu; Stephanie A. Montgomery, stephanie@med.unc.edu; Richard C. Boucher, richard\_boucher@med.unc.edu; Ralph S. Baric, rbaric@email.unc.edu

DOI: 10.1126/scitranslmed.abo5070

**The PDF file includes:**

Figs. S1 to S8  
Tables S1 to S3

**Other Supplementary Material for this manuscript includes the following:**

MDAR Reproducibility Checklist  
Data files S1 to S7

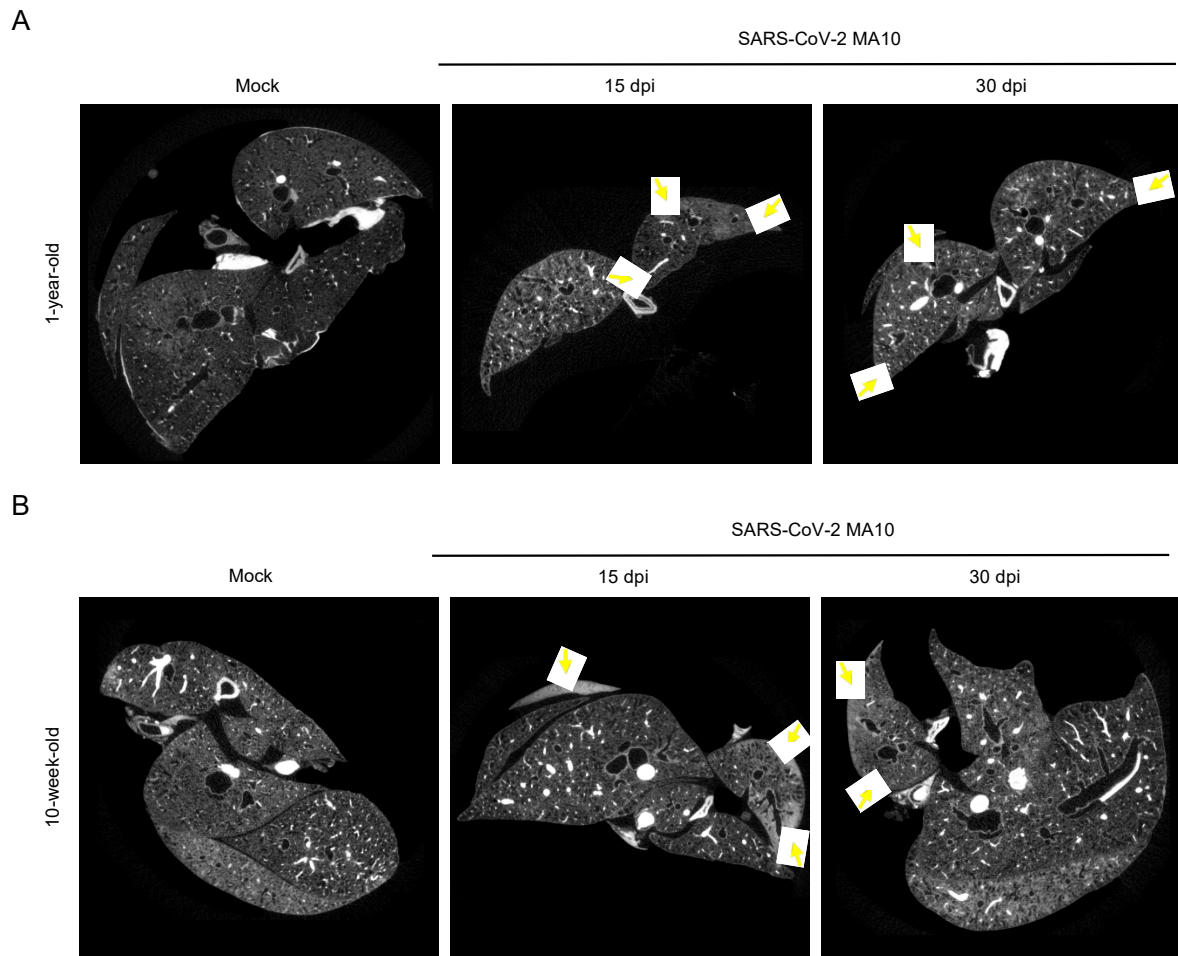

1

2 **Fig. S1. Micro-computed tomography (CT) scans of mouse lungs reveal pulmonary disease.**

3 Representative images of specimen micro-CT scans are shown for (A) 1-year-old female mice and (B) 10-

4 week-old female mice that were either mock-treated or infected with  $10^3$  or  $10^4$  PFU of SARS-CoV-2 MA10,

5 respectively, and imaged at 15 and 30 days post infection (dpi). Arrows indicate areas of dense ground glass

6 opacity and consolidation representing peripheral fibrosis.

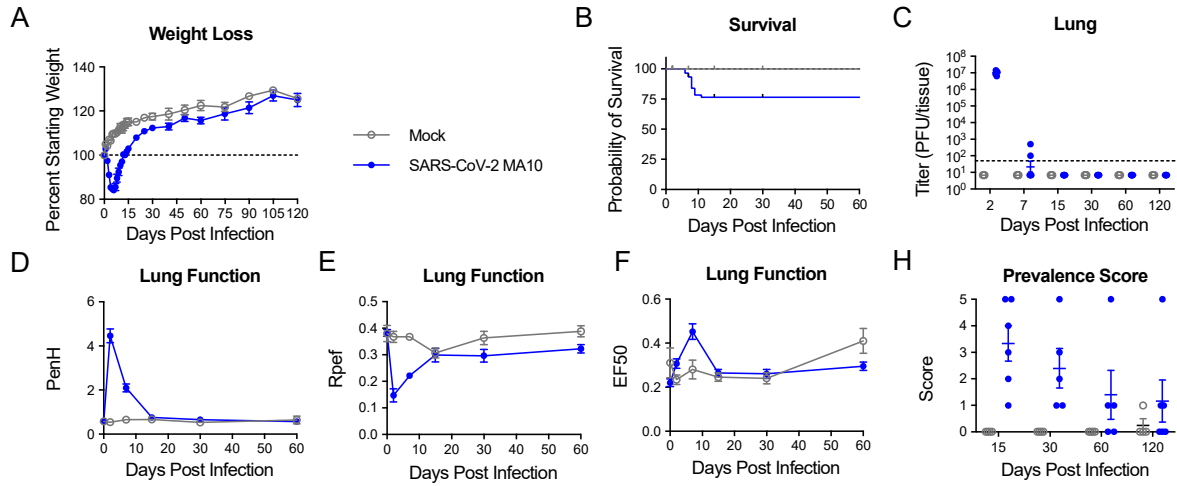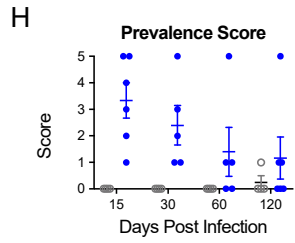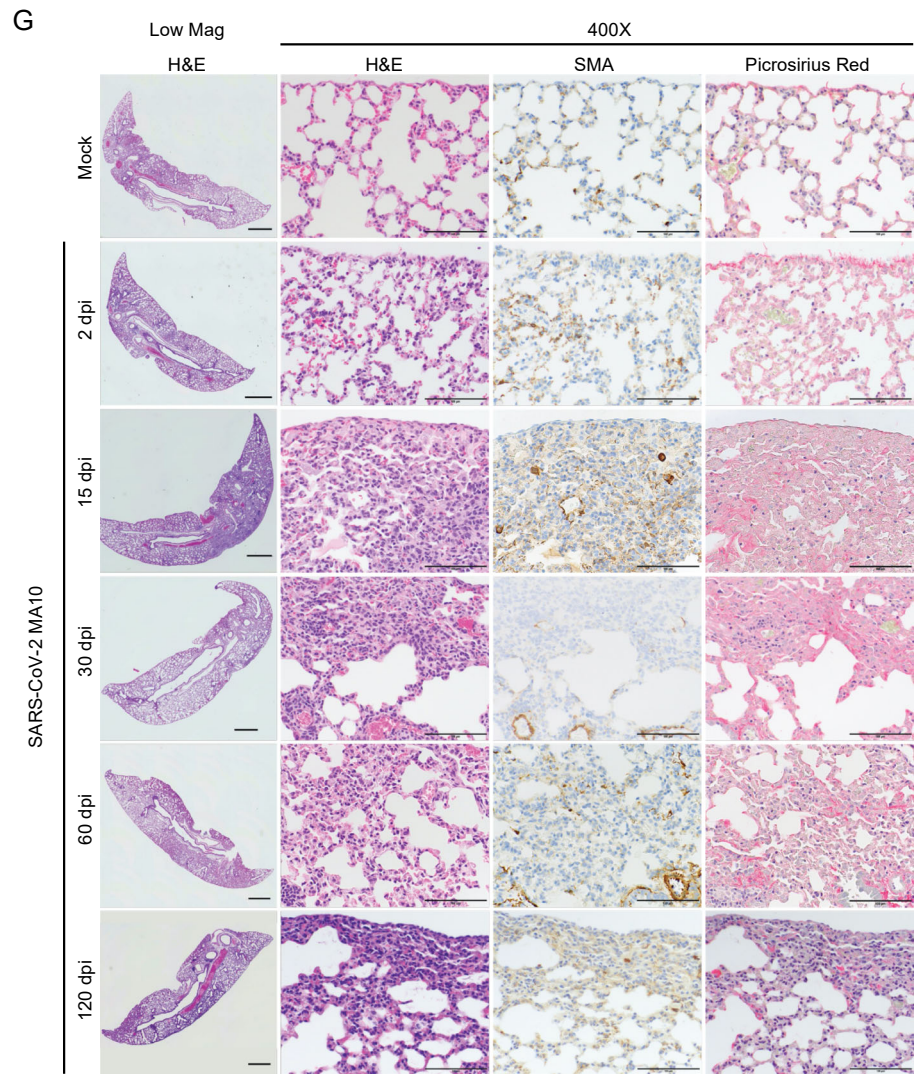

8 **Fig. S2. SARS-CoV-2 MA10 infection causes lung damage in young surviving mice.** 10-week-old  
9 female BALB/c mice were infected with  $10^4$  plaque-forming units (PFU) SARS-CoV-2 (n=66) MA10 or  
10 phosphate-buffered saline (PBS, n=24) and monitored for **(A)** percent starting weight and **(B)** survival. **(C)**  
11 Log transformed infectious virus lung titers were assayed at indicated time points. The dotted line represents  
12 limit of detection. Undetected samples are plotted at half the limit of detection. PFU, plaque-forming units.  
13 **(D to F)** Lung function was assessed by whole body plethysmography for **(D)** enhanced pause (PenH), **(E)**  
14 ratio of time to peak expiratory flow relative to expiratory time (Rpef), and **(F)** mid-tidal expiratory flow  
15 (EF50). **(G)** Histopathological analysis of lungs are shown at indicated time points. H&E: hematoxylin and  
16 eosin. SMA: 3,3'-diaminobenzidine- (DAB) labeling (brown) immunohistochemistry for  $\alpha$ -smooth muscle  
17 actin. Picrosirius Red staining (bright pink-red) highlights collagen fibers. Image scale bars represents 1000  
18  $\mu\text{m}$  for low magnification and 100  $\mu\text{m}$  for 400X images. **(H)** Disease incidence scoring is shown for the  
19 indicated time points: 0 = 0% of total parenchyma; 1 = less than 5%; 2 = 6 to 10%; 3 = 11 to 50%; 4 = 51  
20 to 95%; 5 = greater than 95%. In **(C and H)**, graphs represent individuals necropsied at each timepoint.  
21 Data in **(A to H)** are shown as mean  $\pm$  standard error of the mean. Mock infected animals represented by  
22 open gray circles and SARS-CoV-2 MA10 infected animals are represented by closed blue circles.

23

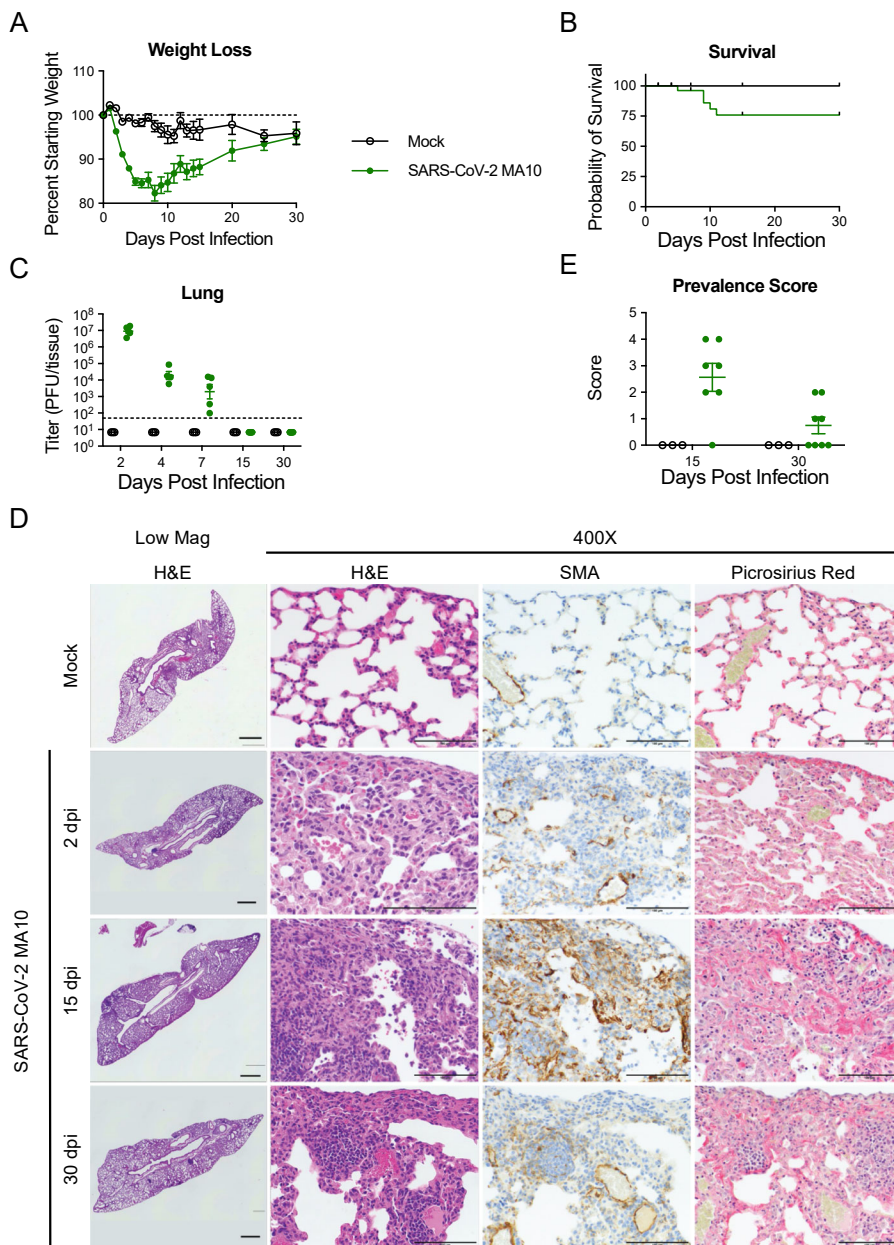

24

25 **Fig. S3. SARS-CoV-2 infection causes lung damage in surviving aged C57BL/6J mice.** 1-year-old  
 26 female C57BL/6J mice were infected with 10<sup>4</sup> PFU SARS-CoV-2 MA10 (n=35) or PBS (n=15) and  
 27 monitored for (A) percent starting weight and (B) survival. (C) Log transformed infectious virus lung titers  
 28 were assayed at indicated time points. Dotted line represents limit of detection. Undetected samples are  
 29 plotted at half the limit of detection. (D) Histopathological analysis of lungs at indicated time points. H&E:

30 hematoxylin and eosin. SMA: immunohistochemistry for  $\alpha$ -smooth muscle actin. Picrosirius Red staining  
31 highlights collagen fibers. Image scale bars represents 1000  $\mu\text{m}$  for low magnification and 100  $\mu\text{m}$  for 400X  
32 images. **(E)** Disease incidence scoring at indicated time points: 0 = 0% of total area of examined section; 1  
33 = less than 5%; 2 = 6 to 10%; 3 = 11 to 50%; 4 = 51 to 95%; 5 = greater than 95%. Graphs represent  
34 individuals necropsied at each timepoint **(C and D)**, with the average value for each treatment and error  
35 bars representing standard error of the mean **(A to D)**. Mock infected animals are represented by closed  
36 black circles and SARS-CoV-2 MA10 infected animals are represented by closed green circles.

37

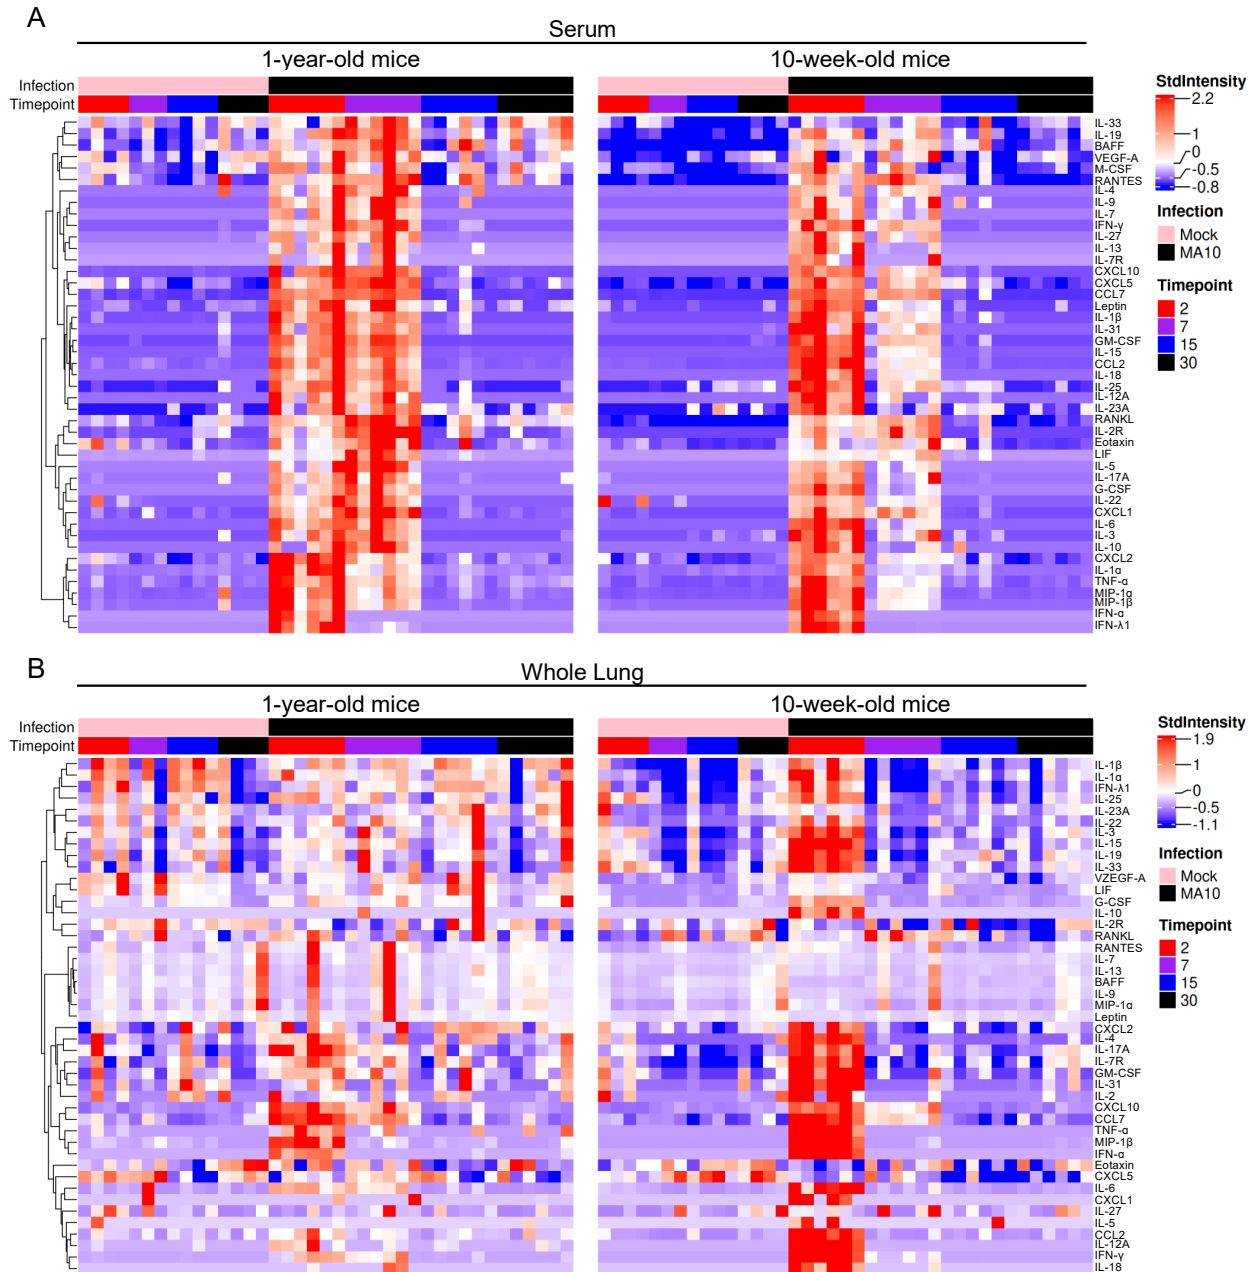

38

39 **Fig. S4: SARS-CoV-2 MA10 induces local and systemic cytokine and chemokine responses.** Heatmaps  
40 of cytokine and chemokine protein concentrations in lung tissue homogenate (A) or serum (B) in 1-year-  
41 old or 10-week-old female mock or SARS-CoV-2 MA10 infected mice at 2, 7, 15, and 30 dpi.

42



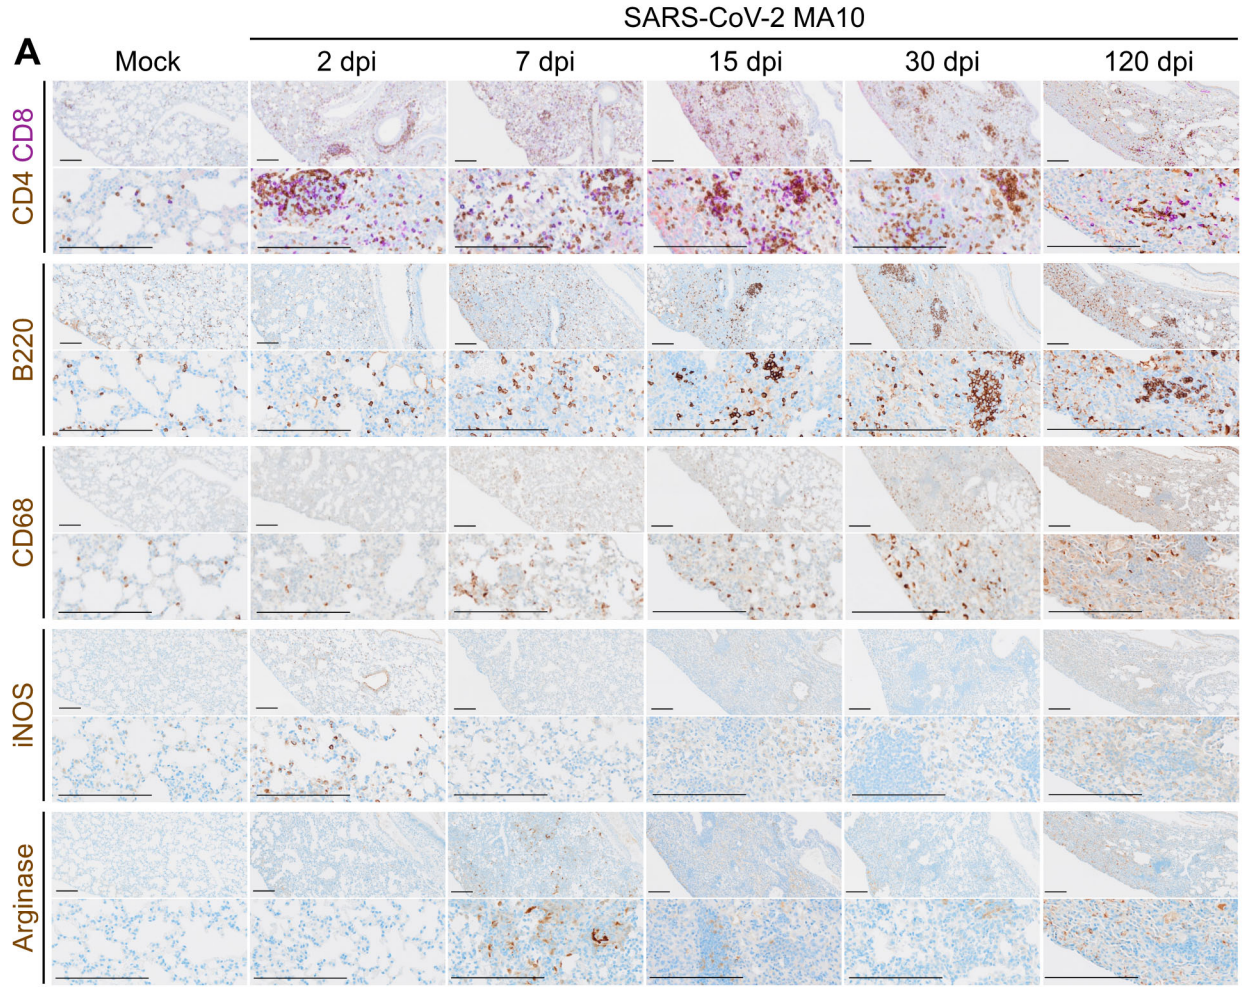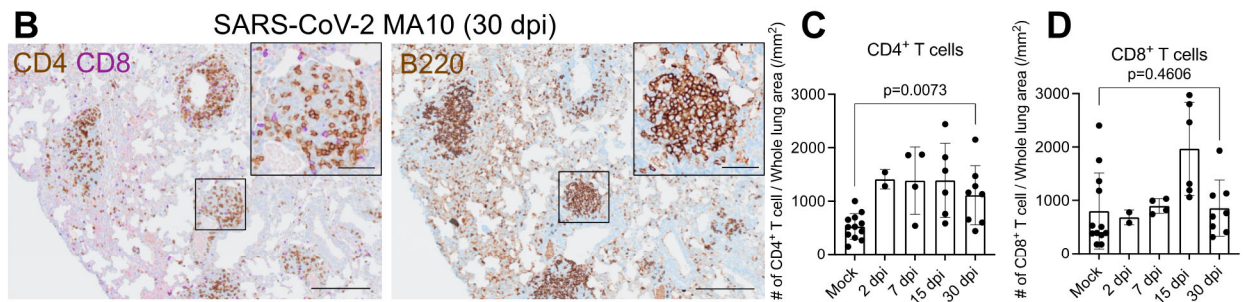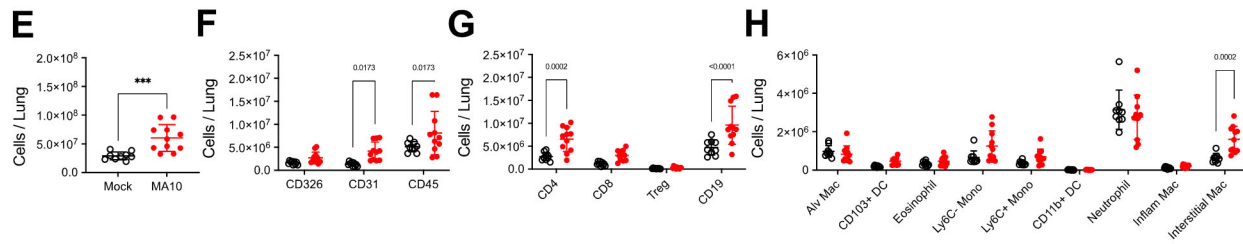



44 **Fig. S5: SARS-CoV-2 MA10 induces robust immune cell infiltration.** (A) Immunohistochemistry of  
45 CD4<sup>+</sup> (brown) and CD8<sup>+</sup> T (purple) cells, B220<sup>+</sup> B cells, CD68<sup>+</sup> macrophages, and inducible nitric oxide  
46 synthase (iNOS)<sup>+</sup> M1 and Arginase<sup>+</sup> M2 macrophages is shown for lungs from 1-year-old female BALB/c  
47 mice at indicated time points after SARS-CoV-2 MA10 infection compared to mock. Scale Bars = 200  $\mu$ m.  
48 (B) Immunohistochemistry is shown depicting alveolar lymphocyte aggregates consisting of CD4<sup>+</sup>, CD8<sup>+</sup>,  
49 and B220<sup>+</sup> B cells at 30 dpi. Scale Bars = 200  $\mu$ m (low power) and 50  $\mu$ m (insets). (C and D) Quantification  
50 of (C) CD4<sup>+</sup> and (D) CD8<sup>+</sup> T cells is shown based on immunohistochemistry (A). Number of (C) CD4<sup>+</sup> and  
51 (D) CD8<sup>+</sup> cells were counted and normalized to whole lung area (mm<sup>2</sup>) at mock or SARS-CoV-2 MA10-  
52 infected 1-year-old female BALB/c mice at indicated time points. Graphs represent individuals necropsied  
53 at each timepoint with the average value for each treatment and error bars representing standard error of  
54 the mean. Wilcoxon rank-sum test was used to test the difference in CD4<sup>+</sup> or CD8<sup>+</sup> T cells identified by  
55 immunohistochemistry between two groups (C, D). (E to H) Quantification of cells by flow cytometry is  
56 shown, including (E) total live cell counts; (F) total CD326<sup>+</sup> epithelial, CD31<sup>+</sup> endothelial, and CD45<sup>+</sup>  
57 immune cells; (G) CD4<sup>+</sup>, CD8<sup>+</sup>, regulatory T cells (Tregs), and CD19<sup>+</sup> B cells; and (H) subsets of myeloid  
58 lineage immune cells. Alv, alveolar; Mac, macrophage; Mono, monocyte; DC, dendritic cell; Inflam,  
59 inflammatory. Graphs include individuals selected for flow cytometry with average and error bars  
60 representing the standard error of the mean. Mock individuals are represented by open black circles and  
61 SARS-CoV-2 infected are represented by closed red circles in (E to H). Flow cytometry data were analyzed  
62 by Wilcoxon rank-sum test (E) or ANOVA followed by Sidak's multiple comparisons test (F to H).  
63

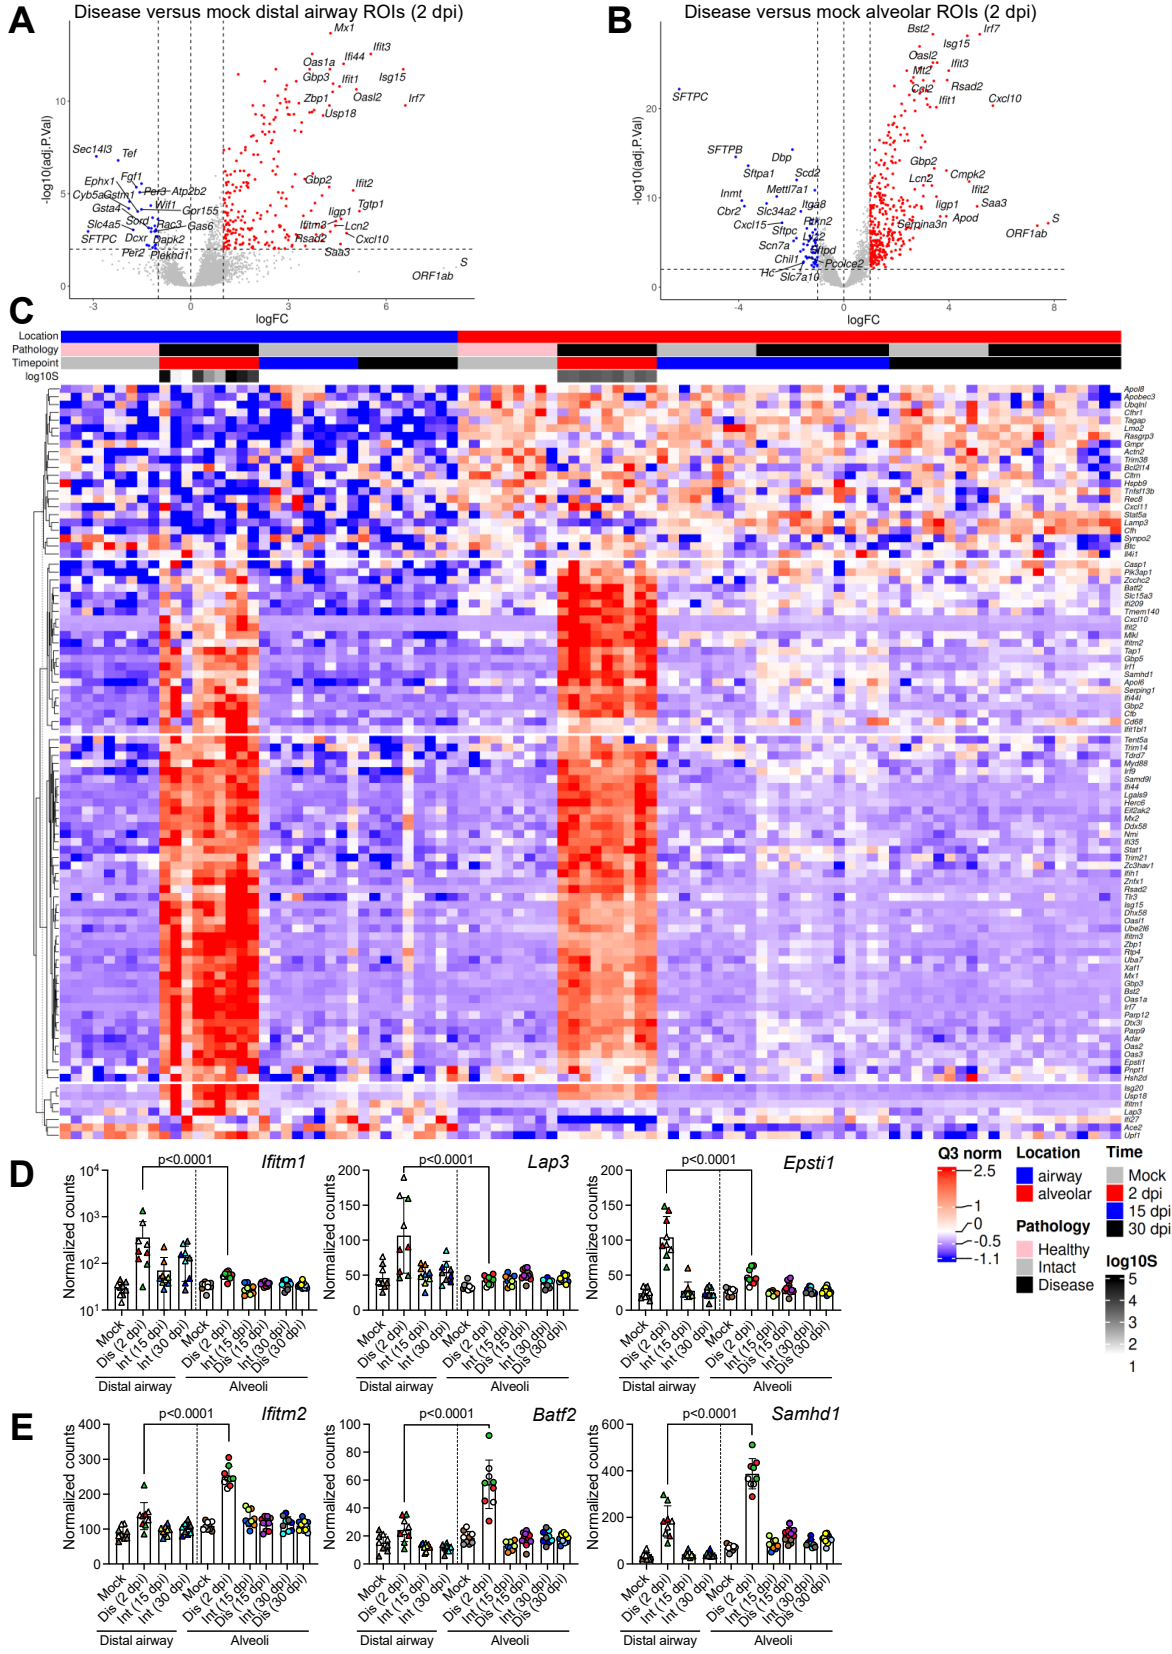

65 **Fig. S6: Upregulation of interferon stimulated gene (ISG) expression after SARS-CoV-2 infection. (A**  
66 **and B)** Volcano plots of digital spatial profiling (DSP) differentially expressed genes (DEGs) in SARS-  
67 CoV-2 MA10 infected (A) distal airway or (B) alveolar regions of interest (ROIs) at 2 dpi (D2) versus mock  
68 1-year-old female BALB/c mice. (C) DSP heatmap of selected ISGs in alveolar and distal airway epithelial  
69 ROIs across all time points in mock and SARS-CoV-2 MA10-infected 1-year-old female BALB/c mice.  
70 DSP Q3 normalized counts of SARS-CoV-2 MA10 Spike (S) of ROIs are log<sub>10</sub> transformed and  
71 represented by gray color intensity. (D and E) DSP Q3 normalized counts are shown for selected ISGs  
72 highly upregulated in (D) distal airway disease ROIs or (E) alveolar disease ROIs at 2 dpi in SARS-CoV-  
73 2 MA10-infected 1-year-old female BALB/c mice. Graphs represent all ROIs selected with triangles  
74 representing distal airway, circles representing alveoli, and each unique color representing one animal; bars  
75 represent average value of each group with error bars representing standard error of the mean in (D and E).  
76 The difference in DSP Q3 normalized counts for targeted genes in ROIs between each condition and time  
77 point was statistically tested using a linear mixed-effect model with condition and time point as fixed effects  
78 and replicate mice as random-effect factors.

79

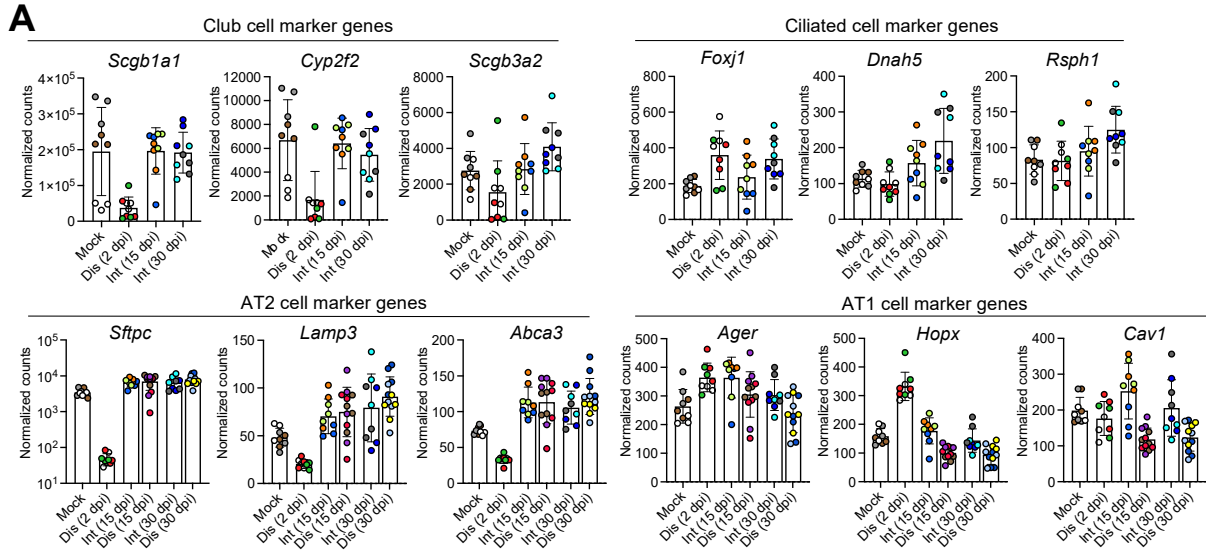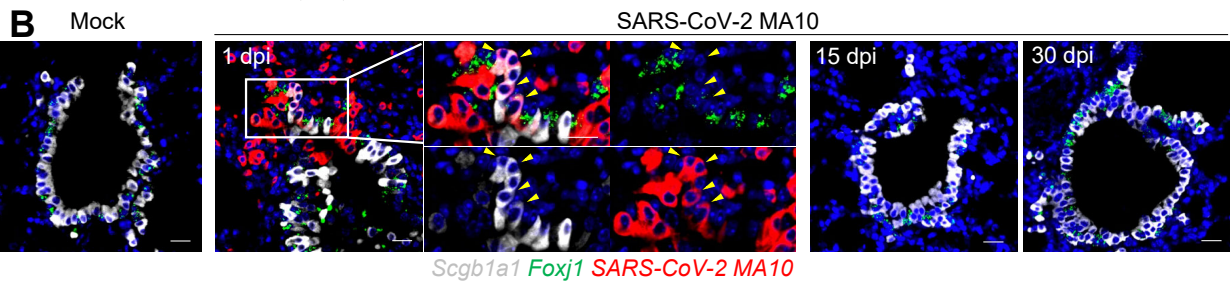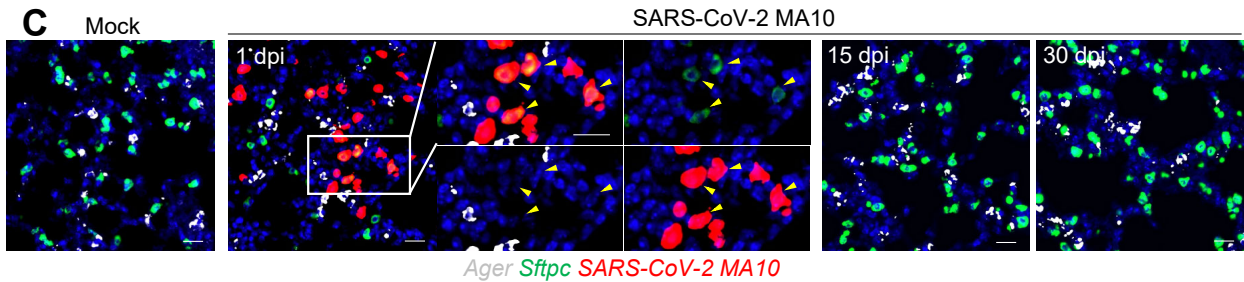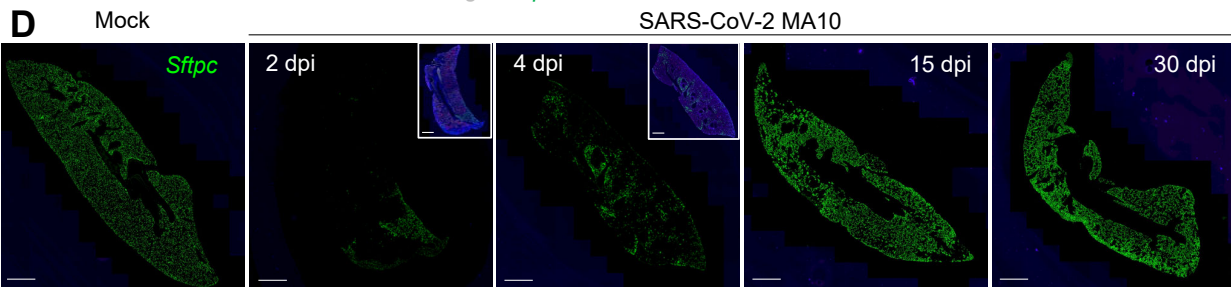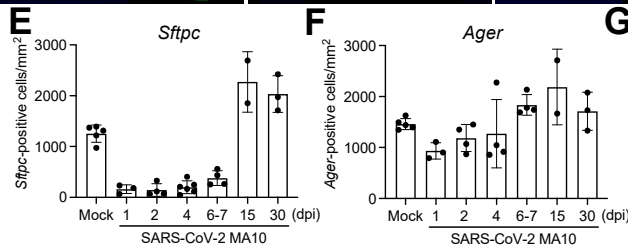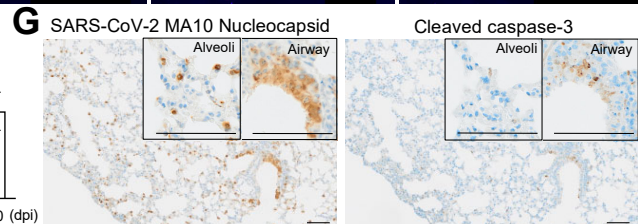

81 **Fig. S7. SARS-CoV-2 MA10 infection causes transient loss of club and Alveolar Type II (AT2) cells.**  
82 (A) DSP Q3 normalized counts for club (top left), ciliated (top right), AT2 (bottom left), and AT1 (bottom  
83 right) cell markers in mock, infected diseased (Dis), or intact (Int) distal airway (top row) or alveolar  
84 (bottom row) ROIs in mock and SARS-CoV-2 MA10-infected 1-year-old female BALB/c mice. Graphs  
85 represent all ROIs selected with each unique color representing one animal; bars represent average value  
86 of each group with error bars representing standard error of the mean. (B) RNA in situ hybridization (RNA-  
87 ISH) is shown for club (*Scgbl1a1*) and ciliated (*FoxJ1*) markers at indicated timepoints in mock and SARS-  
88 CoV-2 MA10-infected 1-year-old female BALB/c mice. Arrow heads indicate colocalization of *SARS-*  
89 *CoV-MA10 RNA* with *Scgbl1a1*. (C) RNA-ISH is shown for AT2 (*Sftpc*) and AT1 (*Ager*) markers at  
90 indicated timepoints in mock and SARS-CoV-2 MA10-infected 1-year-old female BALB/c mice.  
91 Arrowheads indicate colocalization of *SARS-CoV-MA10 RNA* with *Sftpc*. In (B and C), scale bars = 20  $\mu$ m.  
92 (D) Low magnification RNA-ISH is shown for *Sftpc* at indicated time points in mock and SARS-CoV-2  
93 MA10-infected 1-year-old female BALB/c mice. Scale Bars = 1 mm. (E and F) Quantification of RNA-  
94 ISH is shown for (E) *Sftpc* or (F) *Ager* at indicated timepoints with average and standard error of the mean  
95 plotted. (E) *Sftpc* or (F) *Ager*-positive cells were counted and normalized to whole lung area ( $\text{mm}^2$ ). (G)  
96 Immunohistochemistry for SARS-CoV-2 Nucleocapsid protein and cleaved caspase-3 is shown for lung  
97 samples collected at 2 dpi in SARS-CoV-2 MA10-infected 1-year-old female BALB/c mice. Scale Bars =  
98 100  $\mu$ m.

99



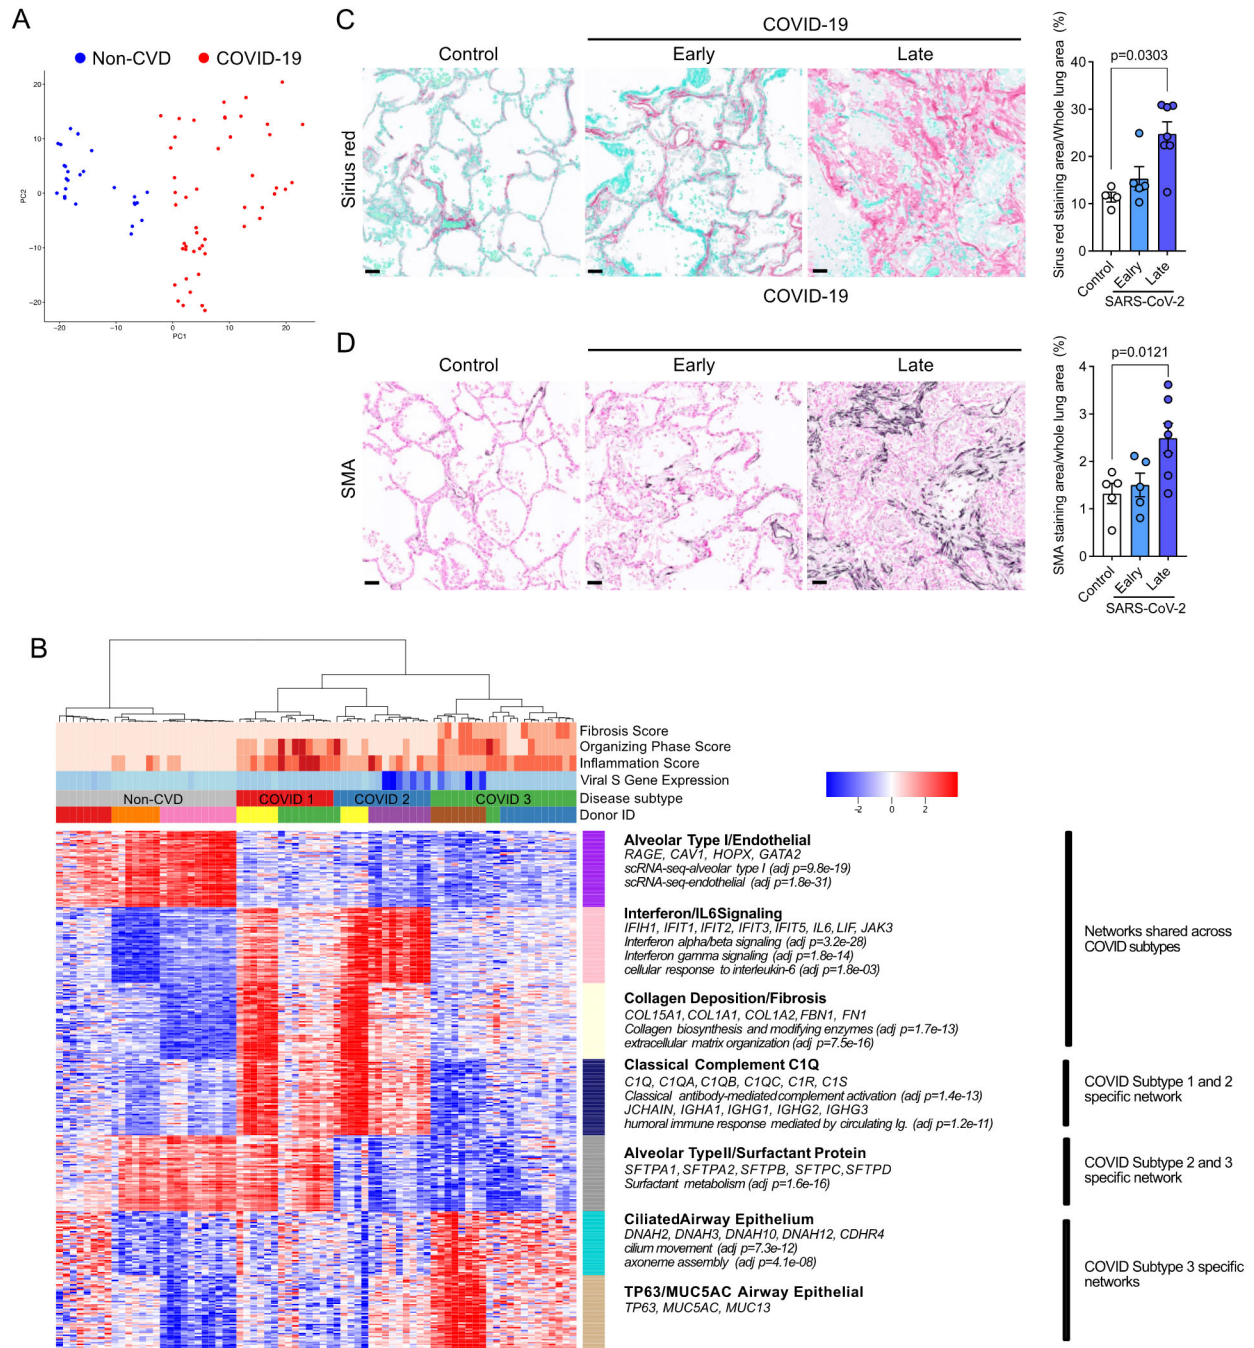

100

101 **Fig. S8. SARS-CoV-2 MA10 pathogenesis closely resembles late human coronavirus disease 2019**  
 102 **(COVID-19).** (A) Principal component analysis (PCA) plot of DSP alveolar ROIs selected in non-COVID-  
 103 19 (non-CVD) (n=3) and COVID-19 (n=5) human donor lungs. (B) DSP heatmap of 7 identified networks  
 104 in alveolar ROIs obtained from non-COVID-19 controls and individuals with COVID-19. Hierarchical  
 105 clustering segregated COVID-19 ROIs into three subtypes (COVID 1, COVID 2, and COVID 3). DSP Q3

106 normalized counts of SARS-CoV-2 Spike (*S*) gene and histopathological scoring of alveolar ROIs for  
107 inflammation, organizing phase of lung injury, and fibrosis are shown. **(C and D)** Histopathological  
108 analysis of fibrotic features in control (n=4), early (n=5), and late (n=6) COVID-19 autopsy lungs by  
109 Picrosirius red (bright red-pink) for collagen deposition **(C)** and DAB/nickel-labeling (black)  
110 immunohistochemistry for smooth muscle actin (SMA) **(D)**. Scale Bars = 50  $\mu$ m. Picrosirius red and SMA  
111 immunohistochemistry quantification represents average value for each group, with error bars representing  
112 standard error of the mean. Wilcoxon rank-sum test was used to test the difference in normalized Picrosirius  
113 red- or SMA-stained areas identified by immunohistochemistry between two groups.

114

115 **Supplemental Table 1: Reagents and Materials**

| Material                                                           | Company/Source           | Product/Reference Number |
|--------------------------------------------------------------------|--------------------------|--------------------------|
| <b>Antibodies</b>                                                  |                          |                          |
| SARS-CoV-1 nucleocapsid, dilution at 1:8000                        | Novus Biologicals        | Cat#NB100-56576          |
| Rabbit polyclonal SARS coronavirus nucleocapsid, dilution at 1:500 | Invitrogen               | Cat#RRID: AB_1087200     |
| Goat anti-CCSP, dilution at 1:3000                                 | Sigma-Aldrich            | Cat#ABS1673              |
| Rat DC-LAMP (LAMP3) antibody, dilution at 1:100                    | NOVUS Biologicals        | Cat#1010E1.01            |
| Alpha Smooth Muscle Actin Antibody [1:2000]                        | Abcam                    | Cat#ab124964             |
| Picrosirius Red                                                    | Polysciences Inc.        | Cat#24901-500            |
| Hematoxylin                                                        | Richard Allen Scientific | Cat#7231L                |
| CD4 Antibody [1:1000]                                              | Abcam                    | Cat#ab183685             |
| CD8 Antibody [1:100]                                               | Invitrogen               | Cat#14-0808-82           |
| B220 Antibody [1:500]                                              | BD Pharmingen            | Cat#550286               |
| Ly6G Antibody [1:500]                                              | Abcam                    | Cat#ab238132             |
| CD68 Antibody 1:100                                                | Abcam                    | Cat#ab125212             |
| iNos Antibody [1:175]                                              | Millipore                | Cat#ABN26                |
| Arginase Antibody [1:100]                                          | Cell Signaling           | Cat#93668s               |
| Alpha Smooth Muscle Actin Antibody [1:2000]                        | Abcam                    | Cat#ab124964             |
| CD45 Antibody (GeoMx Solid Tumor TME Morphology Kit-Mouse)         | NanoString               | Cat#121300304            |
| COL1A1 Antibody, dilution at 1:500                                 | Abcam                    | Cat#ab21286              |
| Human SMA Antibody [1:1000]                                        | Abcam                    | Cat#ab5694               |
| Sftpc Antibody [1:300]                                             | Millipore                | Cat#AB3786               |
| Krt8 Antibody [1:50]                                               | DSHB                     | Cat#TROMA-I              |
| Ager Antibody [1:300]                                              | R&D                      | Cat#AF1145               |
| GeoMx Solid Tumor TME Morphology Kit-Human                         | NanoString               | Cat#121300310            |
| CD103 BV786 (clone M290)                                           | BD Biosciences           | Cat#564322               |
| FcgRIII/FcgRII (clone 2.4G2)                                       | BD Biosciences           | Cat#553141               |
| Ki67 PE (clone B56)                                                | BD Biosciences           | Cat#556027               |
| Siglec F PE (clone E50-2440)                                       | BD Biosciences           | Cat#552126               |
| CD103 PE/Cy7 (clone 2E7)                                           | BioLegend                | Cat#121426               |
| CD104 APC (clone 346-11A)                                          | BioLegend                | Cat#123612               |
| CD104 FITC (clone 346-11A)                                         | BioLegend                | Cat#123606               |
| CD11b APC Cy7 (clone M1/70)                                        | BioLegend                | Cat#101216               |
| CD11c BV 605 (clone N418)                                          | BioLegend                | Cat#117334               |
| CD14 PE-Cy7 (clone Sa14-2)                                         | BioLegend                | Cat#123316               |
| CD19 BV605 (clone 6D5)                                             | BioLegend                | Cat#115540               |
| CD24 PerCP-Cy5.5 (clone M1/69)                                     | BioLegend                | Cat#101824               |
| CD3 FITC (clone 145-2C11)                                          | BioLegend                | Cat#100306               |
| CD31 PB (BV421) (clone 390)                                        | BioLegend                | Cat#102422               |
| CD326 PE-Dazzle (clone G8.8)                                       | BioLegend                | Cat#118236               |
| CD4 Alexa 700 (clone GK1.5)                                        | BioLegend                | Cat#100429               |
| CD45 BV785 (clone 30-F11)                                          | BioLegend                | Cat#103149               |
| CD45 FITC (clone 30-F11)                                           | BioLegend                | Cat#103108               |
| CD64 PE-Cy7 (clone X54-5/7.1)                                      | BioLegend                | Cat#139314               |
| CD8a PE-CF594 (clone 53.6.7)                                       | BioLegend                | Cat#100762               |
| Foxp3 Alexa 647 (clone 150D)                                       | BioLegend                | Cat#320014               |
| g/d PerCP-Cy5.5 (clone GL3)                                        | BioLegend                | Cat#118108               |

|                                                                                                            |                            |                   |
|------------------------------------------------------------------------------------------------------------|----------------------------|-------------------|
| Ly6C PB (clone HK1.4)                                                                                      | BioLegend                  | Cat#128024        |
| Ly6G APC (clone 1A8)                                                                                       | BioLegend                  | Cat#127614        |
| MHCII Alexa 700 (clone M5/114.15.2)                                                                        | BioLegend                  | Cat#107618        |
| NK-1.1 BV785 (clone PK136)                                                                                 | BioLegend                  | Cat#108749        |
| Streptavidin BV421                                                                                         | BioLegend                  | Cat#405225        |
| Streptavidin BV605                                                                                         | BioLegend                  | Cat#405229        |
| T1 alpha biotin (clone 8.1.1)                                                                              | BioLegend                  | Cat#127404        |
| Zombie aqua                                                                                                | BioLegend                  | Cat#423102        |
| Zombie NIR                                                                                                 | BioLegend                  | Cat#423106        |
| Donkey anti-Rabbit IgG (H+L) Highly Cross-Adsorbed Secondary Antibody, Alexa Fluor 555, dilution at 1:1000 | Invitrogen                 | Cat#AB_162543     |
| Donkey anti-Rat IgG (H+L) Highly Cross-Adsorbed Secondary Antibody, Alexa Fluor 488, dilution at 1:1000    | Invitrogen                 | Cat#AB_2535794    |
| Donkey anti-Goat IgG (H+L) Cross-Adsorbed Secondary Antibody, Alexa Fluor 647, dilution at 1:1000          | Thermo Fisher Scientific   | Cat#AB_2535864    |
| Discovery OmniMap anti Rabbit HRP                                                                          | Ventana, Roche             | Cat#760-4311      |
| <b>Bacterial and Virus Strains</b>                                                                         |                            |                   |
| SARS-CoV-2 MA10                                                                                            | Leist <i>et al.</i> , 2020 | GenBank: MT952602 |
| <b>Chemicals, Peptides, and Recombinant Proteins</b>                                                       |                            |                   |
| TRIzol Reagent                                                                                             | Thermo Fisher Scientific   | Cat#15596026      |
| <b>Critical Commercial Assays</b>                                                                          |                            |                   |
| Immune Monitoring 48-Plex Mouse ProcartaPlex Panel                                                         | Invitrogen                 | EPX480-20834-901  |
| GeoMx DSP Collection Plate                                                                                 | NanoString                 | 100437            |
| GeoMx Instrument Buffer Kit PCLN                                                                           | NanoString                 | 100474            |
| GeoMx RNA Slide Prep FFPE PCLN                                                                             | NanoString                 | 121300313         |
| GeoMx Seq Code Pack AB                                                                                     | NanoString                 | 121400201         |
| GeoMx NGS RNA WTA Mm                                                                                       | NanoString                 | 121401103         |
| GeoMx Nuclear Stain Morphology Kit                                                                         | NanoString                 | 121300303         |
| GeoMx COV19 Imm Resp Atlas                                                                                 | NanoString                 | 121300314         |
| RNAScope Multiplex Fluorescent Reagent Kit v2                                                              | ACD                        | Cat#323100        |
| RNAScope probe SARS-CoV-2, S gene encoding the spike protein (channel 1, 2, and 3)                         | ACD                        | Cat#848561        |
| RNAScope probe Ager (channel 1)                                                                            | ACD                        | Cat#550791        |
| RNAScope probe Sftpc (channel 2)                                                                           | ACD                        | Cat#314101-C2     |
| RNAScope probe Foxj1 (channel 2)                                                                           | ACD                        | Cat#317091-C2     |
| RNAScope probe Scgbl1a1 (channel 3)                                                                        | ACD                        | Cat#420351-C3     |
| RNAScope probe Fn1                                                                                         | ACD                        | Cat#316951        |
| RNAScope probe Spp1                                                                                        | ACD                        | Cat#435191        |
| RNAScope probe C3                                                                                          | ACD                        | Cat#417841        |
| RNAScope probe Tgfb1                                                                                       | ACD                        | Cat#407751        |
| RNAScope probe Krt8 (channel 3)                                                                            | ACD                        | Cat#424521-C3     |
| RNAScope probe Cdkn1a (channel 2)                                                                          | ACD                        | Cat#408551-C2     |
| RNAScope probe SARS-CoV-2, S gene encoding the spike protein (channel 3)                                   | ACD                        | Cat#848568        |

|                                                    |                                           |                                                                                                                                           |
|----------------------------------------------------|-------------------------------------------|-------------------------------------------------------------------------------------------------------------------------------------------|
| Vector TrueVIEW Autofluorescence Quenching Kit     | Vector Laboratories                       | Cat#SP-8400                                                                                                                               |
| <b>Experimental Models: Cell Lines</b>             |                                           |                                                                                                                                           |
| Vero E6                                            | ATCC                                      | Cat#CRL1586                                                                                                                               |
| <b>Experimental Models: Organisms/Strains</b>      |                                           |                                                                                                                                           |
| Mouse: BALB/c: BALB/cAnNHsd                        | Envigo                                    | Strain 047                                                                                                                                |
| Mouse: C57Bl/6J                                    | The Jackson Labs                          | Strain 000664                                                                                                                             |
| <b>Software and Algorithms</b>                     |                                           |                                                                                                                                           |
| FinePointe (Version 2.3.1.16)                      | DSI Buxco respiratory solutions, DSI Inc. | <a href="https://www.datasci.com/products/software/finepointe-software">https://www.datasci.com/products/software/finepointe-software</a> |
| xPONENT (Version 4.3)                              | Luminex                                   | <a href="https://www.luminexcorp.com/xponent/">https://www.luminexcorp.com/xponent/</a>                                                   |
| GraphPad Prism (Version 8.4.3)                     | GraphPad                                  | <a href="https://graphpad.com">https://graphpad.com</a>                                                                                   |
| Adobe Illustrator (Version 24.2.3)                 | Adobe                                     | <a href="https://www.adobe.com/products/illustrator.html">https://www.adobe.com/products/illustrator.html</a>                             |
| Visiopharm                                         | Visiopharm                                | <a href="https://visiopharm.com/">https://visiopharm.com/</a>                                                                             |
| Olyvia (Version 3.1.1)                             | Olympus                                   | <a href="https://olympus-lifescience.com">https://olympus-lifescience.com</a>                                                             |
| <b>Equipment</b>                                   |                                           |                                                                                                                                           |
| Whole body plethysmography machine                 | DSI Buxco respiratory solutions, DSI Inc. | N/A                                                                                                                                       |
| GeoMx                                              | NanoString                                | N/A                                                                                                                                       |
| MAGPIX machine                                     | Luminex                                   | N/A                                                                                                                                       |
| Leica ASP 6025                                     | Leica                                     | N/A                                                                                                                                       |
| Leica Paraplast                                    | Leica                                     | N/A                                                                                                                                       |
| Ventana Discovery platform                         | Roche                                     | N/A                                                                                                                                       |
| Olympus BX43 light microscope/ Olympus DP27 camera | Olympus                                   | N/A                                                                                                                                       |



117 **Supplemental Table 2: Demographics of donors used for GeoMx DSP.**

| Age | Sex | Health Status | RNA-ISH SARS-CoV-2 | Days Intubated |
|-----|-----|---------------|--------------------|----------------|
| 76  | F   | Non-COVID-19  | Negative           |                |
| 24  | F   | Non-COVID-19  | Negative           |                |
| 42  | F   | Non-COVID-19  | Negative           |                |
| 57  | M   | COVID-19      | Negative           | 21             |
| 67  | M   | COVID-19      | Negative           | 17             |
| 77  | M   | COVID-19      | Positive           | NI             |
| 57  | F   | COVID-19      | Positive           | DNI            |
| 79  | F   | COVID-19      | Positive           | DNI            |

118 DNI: Do Not Intubation, NI: No intubation (Cardiac arrest before intubation)

119 **Supplemental Table 3: Demographics of donors used for quantification of Sirius Red and IHC SMA**  
 120 **staining.**

| Age | Sex | Health Status | Days Intubated | Days of Disease | COVID-19 Phase* |
|-----|-----|---------------|----------------|-----------------|-----------------|
| 43  | M   | Non-COVID-19  |                |                 |                 |
| 27  | M   | Non-COVID-19  |                |                 |                 |
| 48  | M   | Non-COVID-19  |                |                 |                 |
| 37  | M   | Non-COVID-19  |                |                 |                 |
| 24  | M   | Non-COVID-19  |                |                 |                 |
| 40  | M   | COVID-19      | 0              | 3               | Early           |
| 91  | F   | COVID-19      | 0              | 1               | Early           |
| 77  | M   | COVID-19      | 0              | 6               | Early           |
| 42  | M   | COVID-19      | 0              | 0               | Early           |
| 92  | M   | COVID-19      | 0              | 11              | Early           |
| 42  | M   | COVID-19      | Unknown        | 30              | Late            |
| 58  | M   | COVID-19      | 0              | 23              | Late            |
| 69  | M   | COVID-19      | 17             | 32              | Late            |
| 30  | F   | COVID-19      | 25             | 33              | Late            |
| 58  | M   | COVID-19      | 13             | 49              | Late            |
| 61  | M   | COVID-19      | 32             | 36              | Late            |
| 52  | M   | COVID-19      | 29             | 35              | Late            |

121 \*Early- and late- phase specimens were defined as autopsy tissue obtained  $\leq 20$  and  $> 20$  days post the  
 122 onset of symptoms, respectively.

123 **Supplementary Data Files:**

124 Data File 1: Raw data matrix for cytokine data shown in heatmap in fig. S4.

125 Data File 2: Gene lists and clustering information for all heatmaps included in this manuscript.

126 Data File 3: Raw and normalized read counts for mouse digital spatial profiling (DSP) data.

127 Data File 4: Differential gene expression (DEG) analysis of mouse DSP data.

128 Data File 5: Reactome pathway analysis of mouse DSP data.

129 Data File 6: Raw and normalized read counts for human DSP data.

130 Data File 7: Individual-level raw data for all graphs included in this manuscript.
